# Supplementary material for: An enzyme-free and label-free visual sensing strategy for the detection of thrombin using a plasmonic nanoplatform
Source: Royal Society of Chemistry journal article supplement (doi:10.1039/c9an02340b), 2020-01-01
Supplement: c9an02340b1.pdf [file c9an02340b1.pdf]

## **Supporting Information**

### **Enzyme-free and label-free visual strategy for detection of thrombin based on plasmonic nanoplatform**

Cuiyun Yin<sup>†</sup>, Dagang Jiang<sup>†</sup>, Dan Xiao<sup>†</sup>, Cuisong Zhou<sup>†\*</sup>

<sup>†</sup>College of Chemistry, Sichuan University, Chengdu, 610064, P. R. China

#### **Contents:**

1. SEM image of nanofibers (Figure S1)
2. UV-vis spectra and corresponding calibration curve of standard DNA (B-H2) solution. (Figure S2)
3. Optimization of detection system (Figure S3)
4. Reusability of the plasmonic nanoplatform (Figure S4)
5. Stability of the plasmonic nanoplatform (Figure S5)
6. Comparison of this work with other enzyme-based colorimetric nucleic acid assays for thrombin (Table S1)

### SEM image of nanofibers

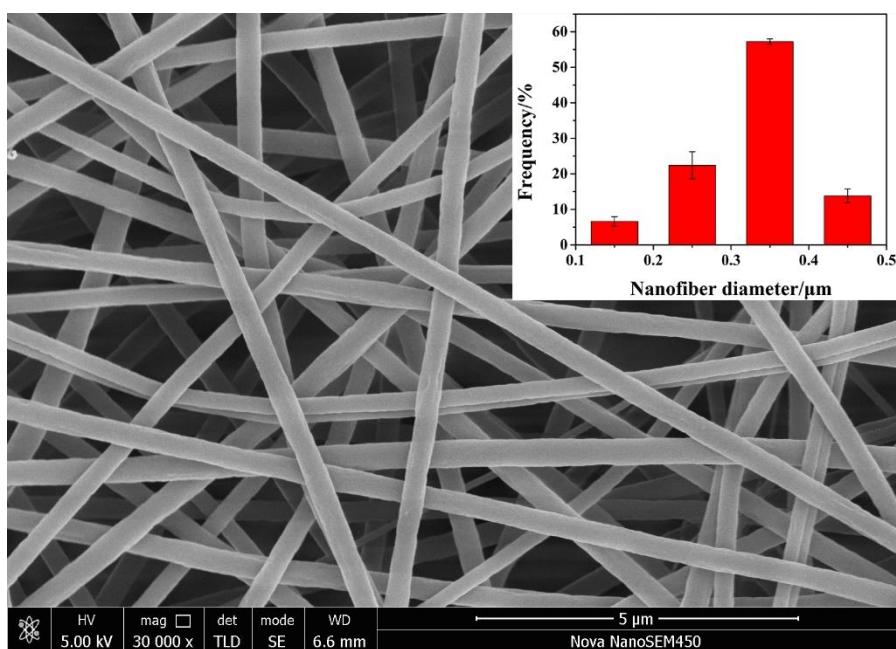

**Figure S1** SEM image of nanofibers. The inset shows the diameter distribution of the nanofibers.

### UV-vis spectra and corresponding calibration curve of standard DNA (B-H2) solution

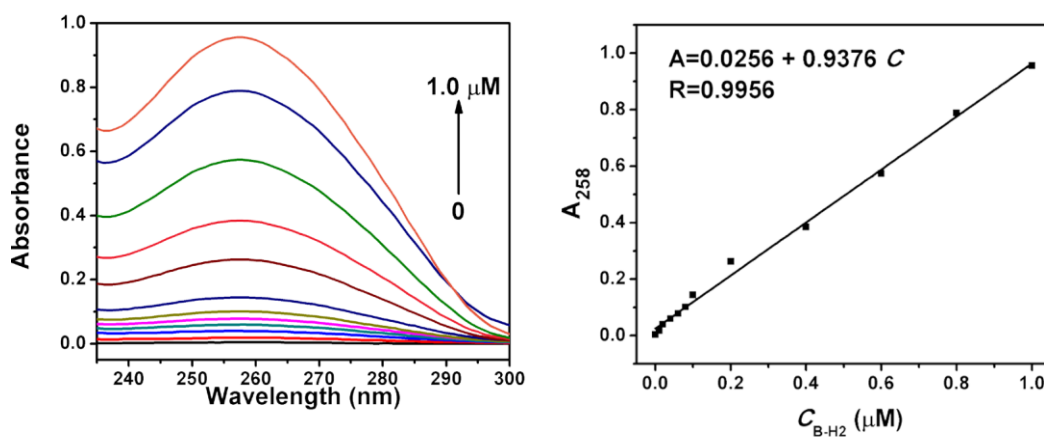

**Figure S2** UV-vis spectra (A) and (B) corresponding calibration curve of standard DNA (B-H2) solution. Immobilization efficiency% = The concentration of immobilized B-H2/Initial concentration of B-H2  $\times$  100%.

### Optimization of detection system

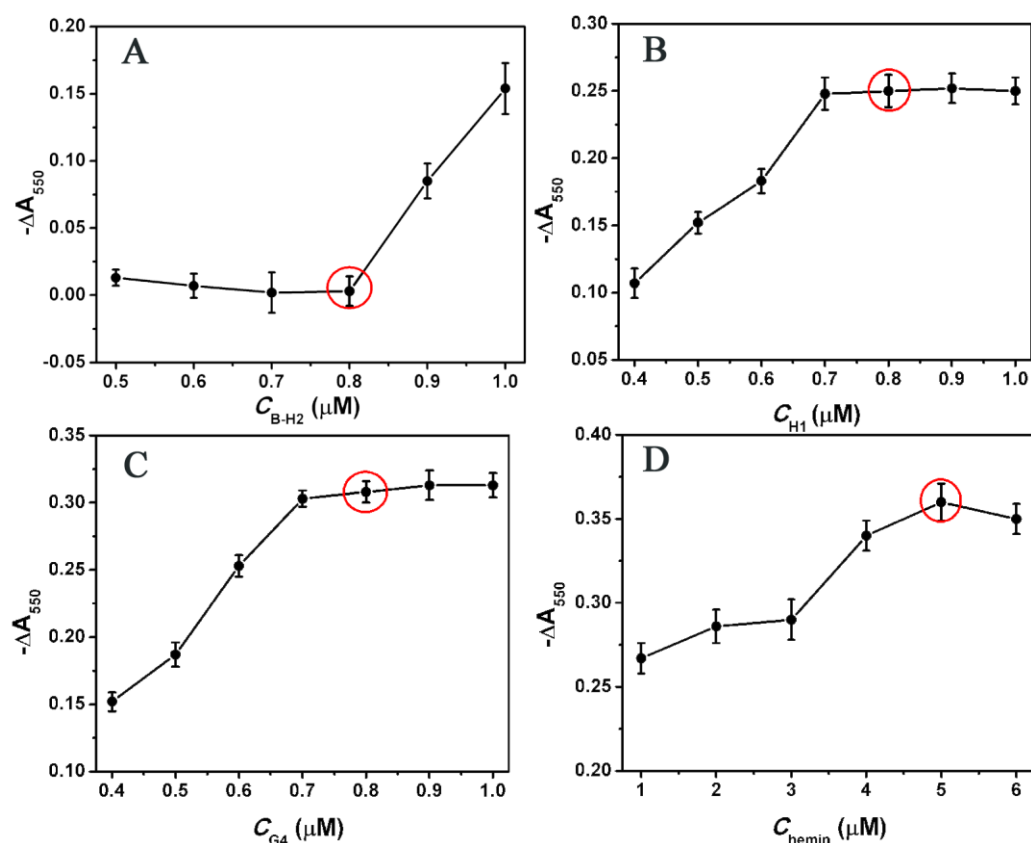

**Figure S3** Absorbance decrement ( $-\Delta A_{550}$ ) of the proposed sensors to 5 nM thrombin at different (A) B-H2, (B) H1, (C) G4, and (D) hemin. The optimized sensing conditions were chosen as follow: the the B-H2, H1, G4, hemin concentration was 0.8  $\mu\text{M}$ , 0.8  $\mu\text{M}$ , 0.8  $\mu\text{M}$  and 5  $\mu\text{M}$ , respectively. The CHA amplification incubation time was 7 h, and the G4 incubation time was 2 h.

### Reusability of the plasmonic nanoplatform

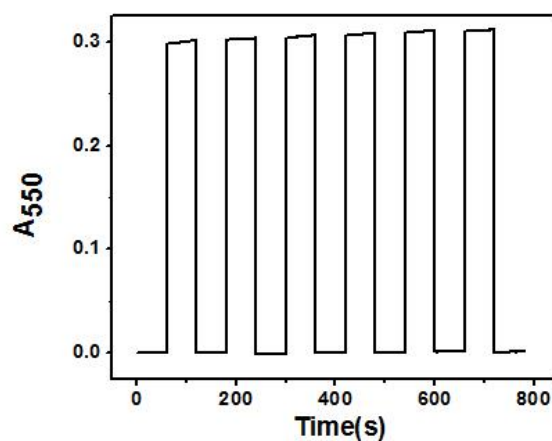

**Figure S4** Reusability of the plasmonic nanoplatform by separately measuring its absorbance in six cycles of testing solution and blank buffer, respectively. The concentration of thrombin is 1

pM.

### Stability of the plasmonic nanoplatform

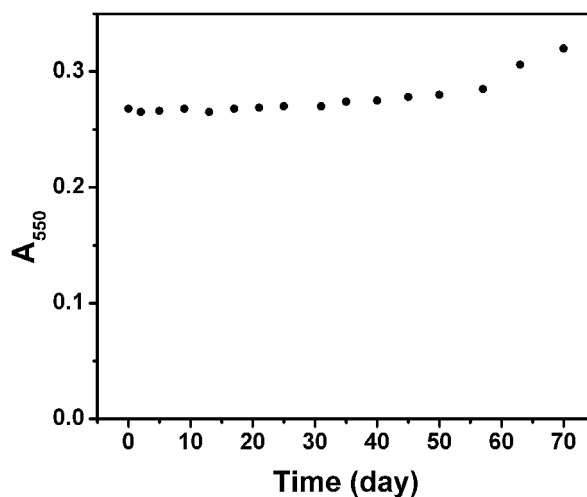

**Figure S5** Stability of the plasmonic nanoplatform in Tris buffer (pH=7.5). The concentration of thrombin is 1 nM.

### Tables S1 Comparison of this work with other enzyme-based colorimetric nucleic acid assays for thrombin

| Strategy                                                                                | LOD      | Ref.      |
|-----------------------------------------------------------------------------------------|----------|-----------|
| Target triggered HCR and in situ generation of DNAzymes and Pt nanozymes                | 100 pM   | 23        |
| Arrest of RCA by protein-binding DNA aptamers by colorimetric method                    | 15 nM    | 24        |
| Snowball assembly of palindromic DNA-AuNPs and AuNPs-catalyzed silver enhancement       | 8.3 nM   | 25        |
| Rolling circle amplification and hemin/G-quadruplex system                              | 83 pg/mL | 26        |
| Label-free, enzyme-free visual strategy for detection of thrombin based on nanoplatform | 1.0 pM   | This work |
